# Supplementary material for: Technical note: The CAMS greenhouse gas reanalysis from 2003 to 2020
Source: Copernicus journal article supplement (doi:10.5194/acp-23-3829-2023), 2023-03-31
Supplement: Supplementary file 1 [file acp-23-3829-2023-supplement.pdf]

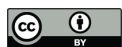

*Supplement of*

## **Technical note: The CAMS greenhouse gas reanalysis from 2003 to 2020**

**Anna Agustí-Panareda et al.**

*Correspondence to:* Anna Agustí-Panareda ([anna.agusti-panareda@ecmwf.int](mailto:anna.agusti-panareda@ecmwf.int))

The copyright of individual parts of the supplement might differ from the article licence.

**Catalogue of AirCore vertical profiles (from NOAA\_AirCore\_data\_v20210813 dataset, Baier et al., 2021) used for the evaluation in Sect. 3.2.**

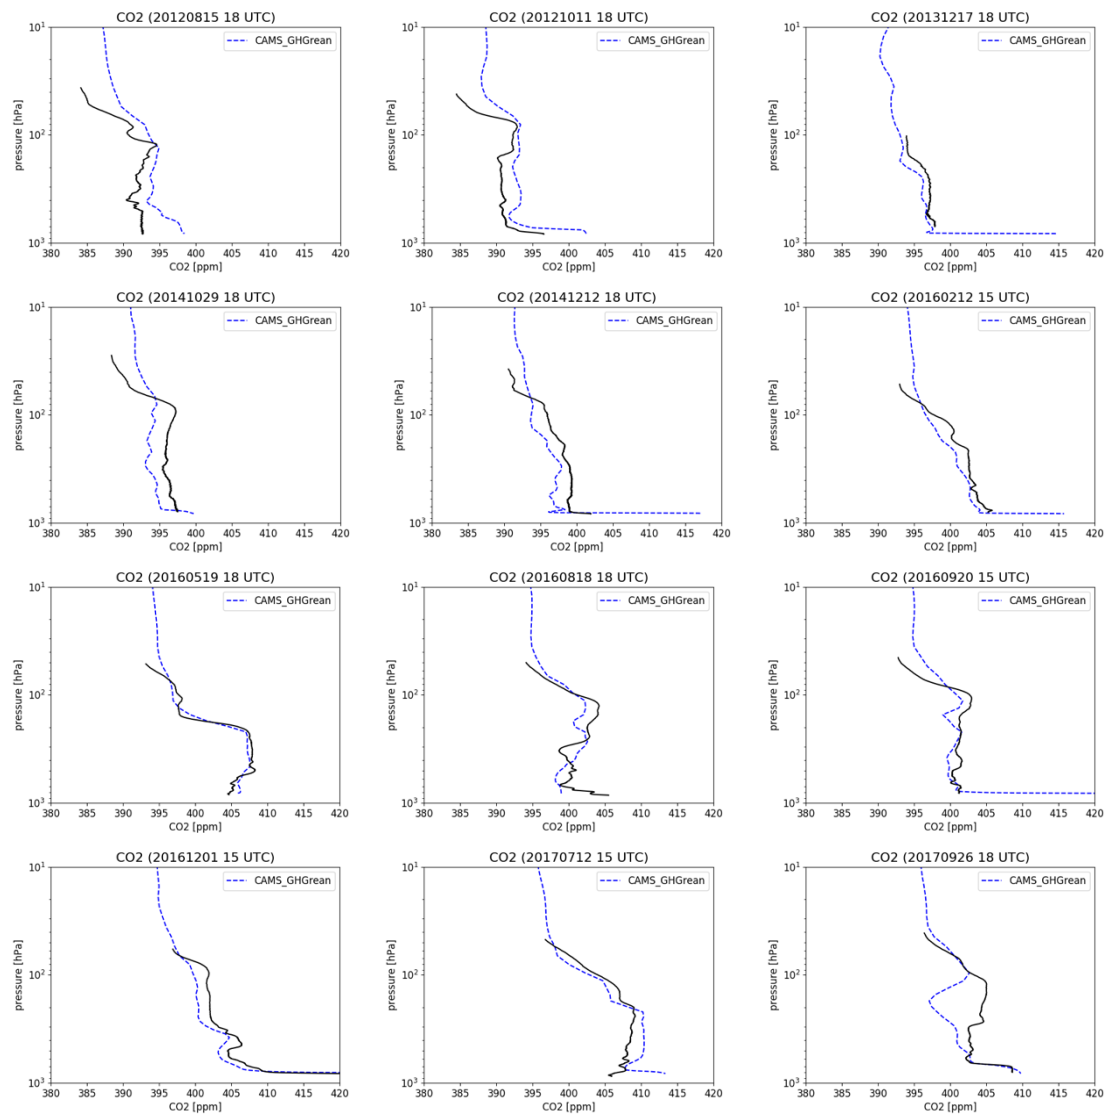

Fig S1a Vertical mole fraction profiles of CO<sub>2</sub> from the CAMS GHG reanalysis (dash line) and AirCore observations (solid line) at Boulder (CO, USA, see Table A3) (*continued in the next page*).

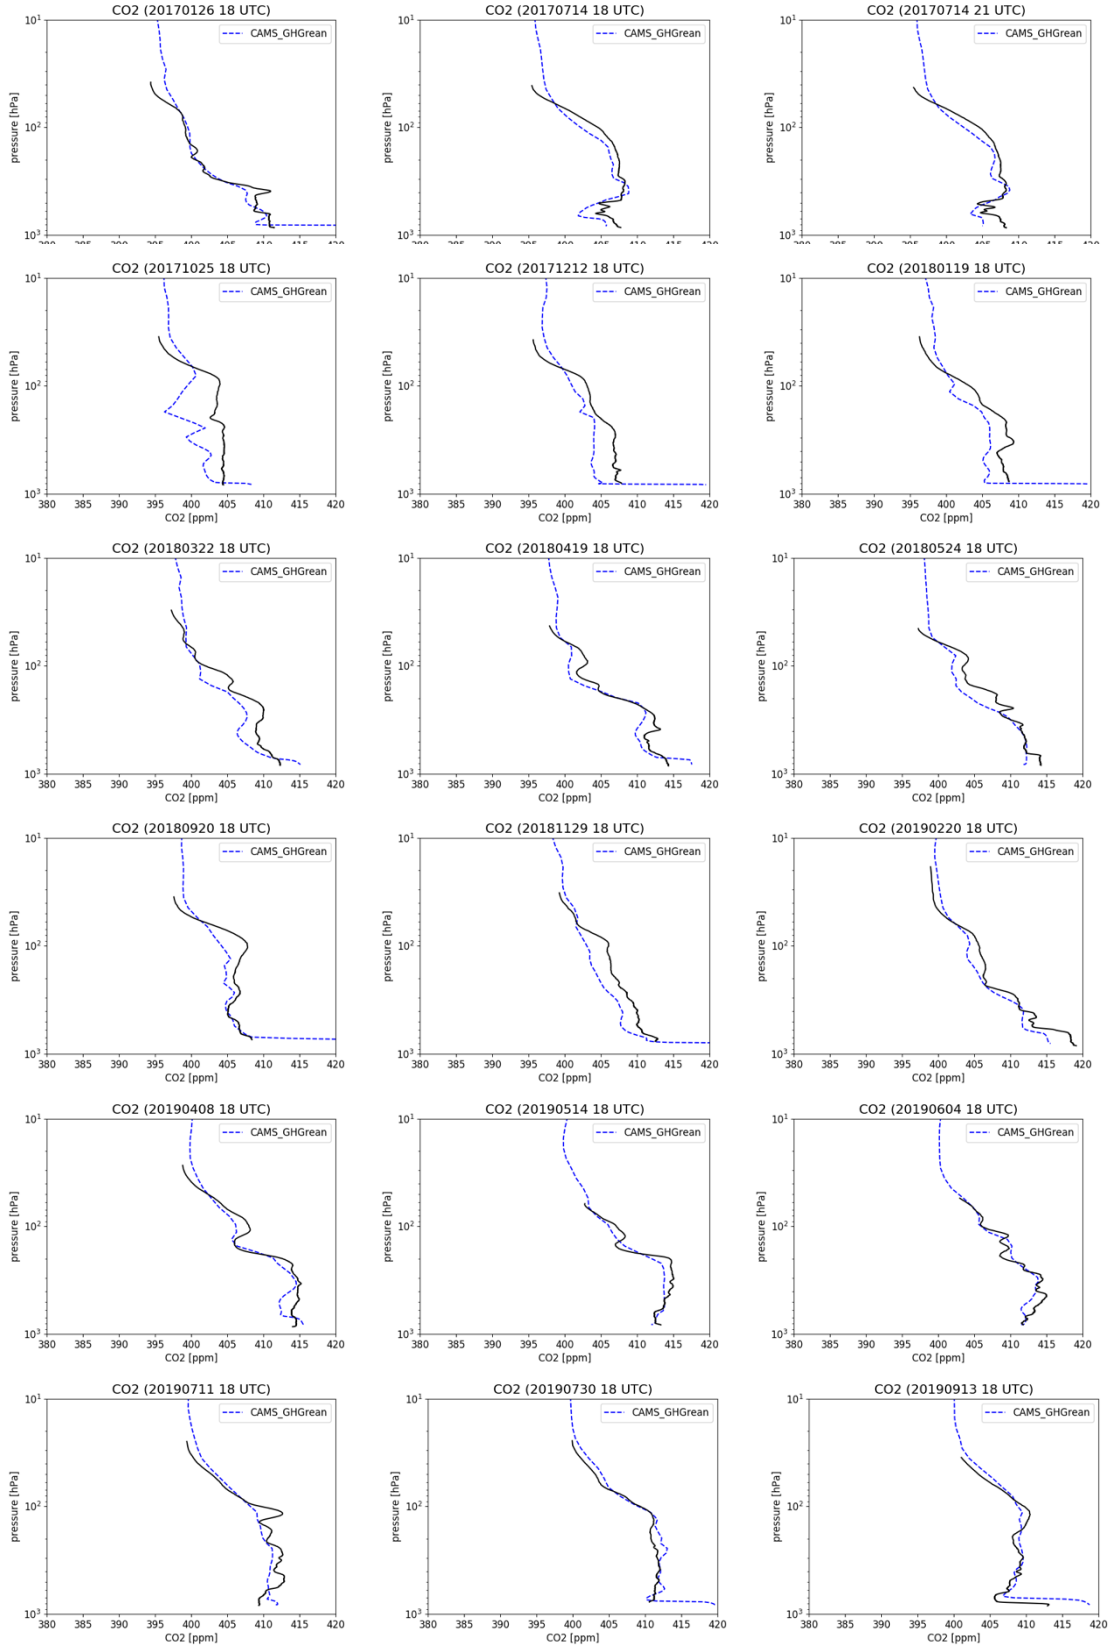

Fig S1a *cont.* Vertical mole fraction profiles of CO<sub>2</sub> from the CAMS GHG reanalysis (dash line) and AirCore observations (solid line) at Boulder (CO, USA, see Table A3) (*continued in the next page*).

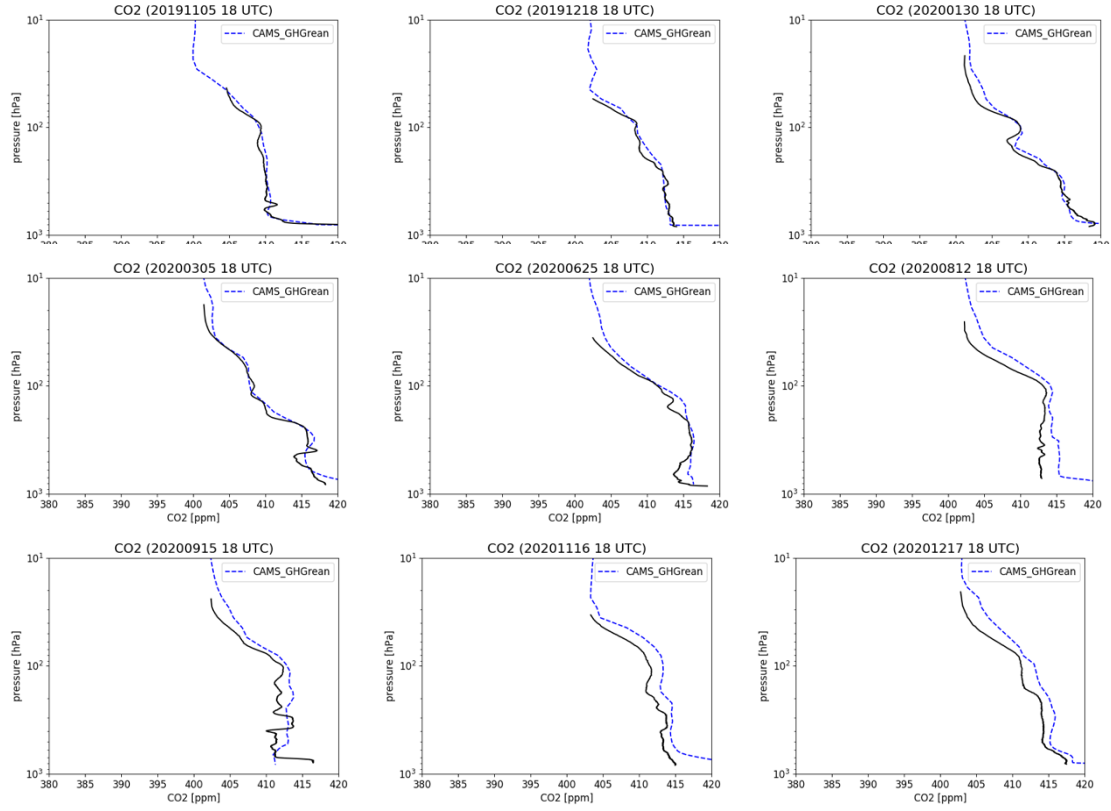

Fig S1a *cont.* Vertical mole fraction profiles of CO<sub>2</sub> from the CAMS GHG reanalysis (dash line) and AirCore observations (solid line) at Boulder (CO, USA, see Table A3) (*continued in the next page*).

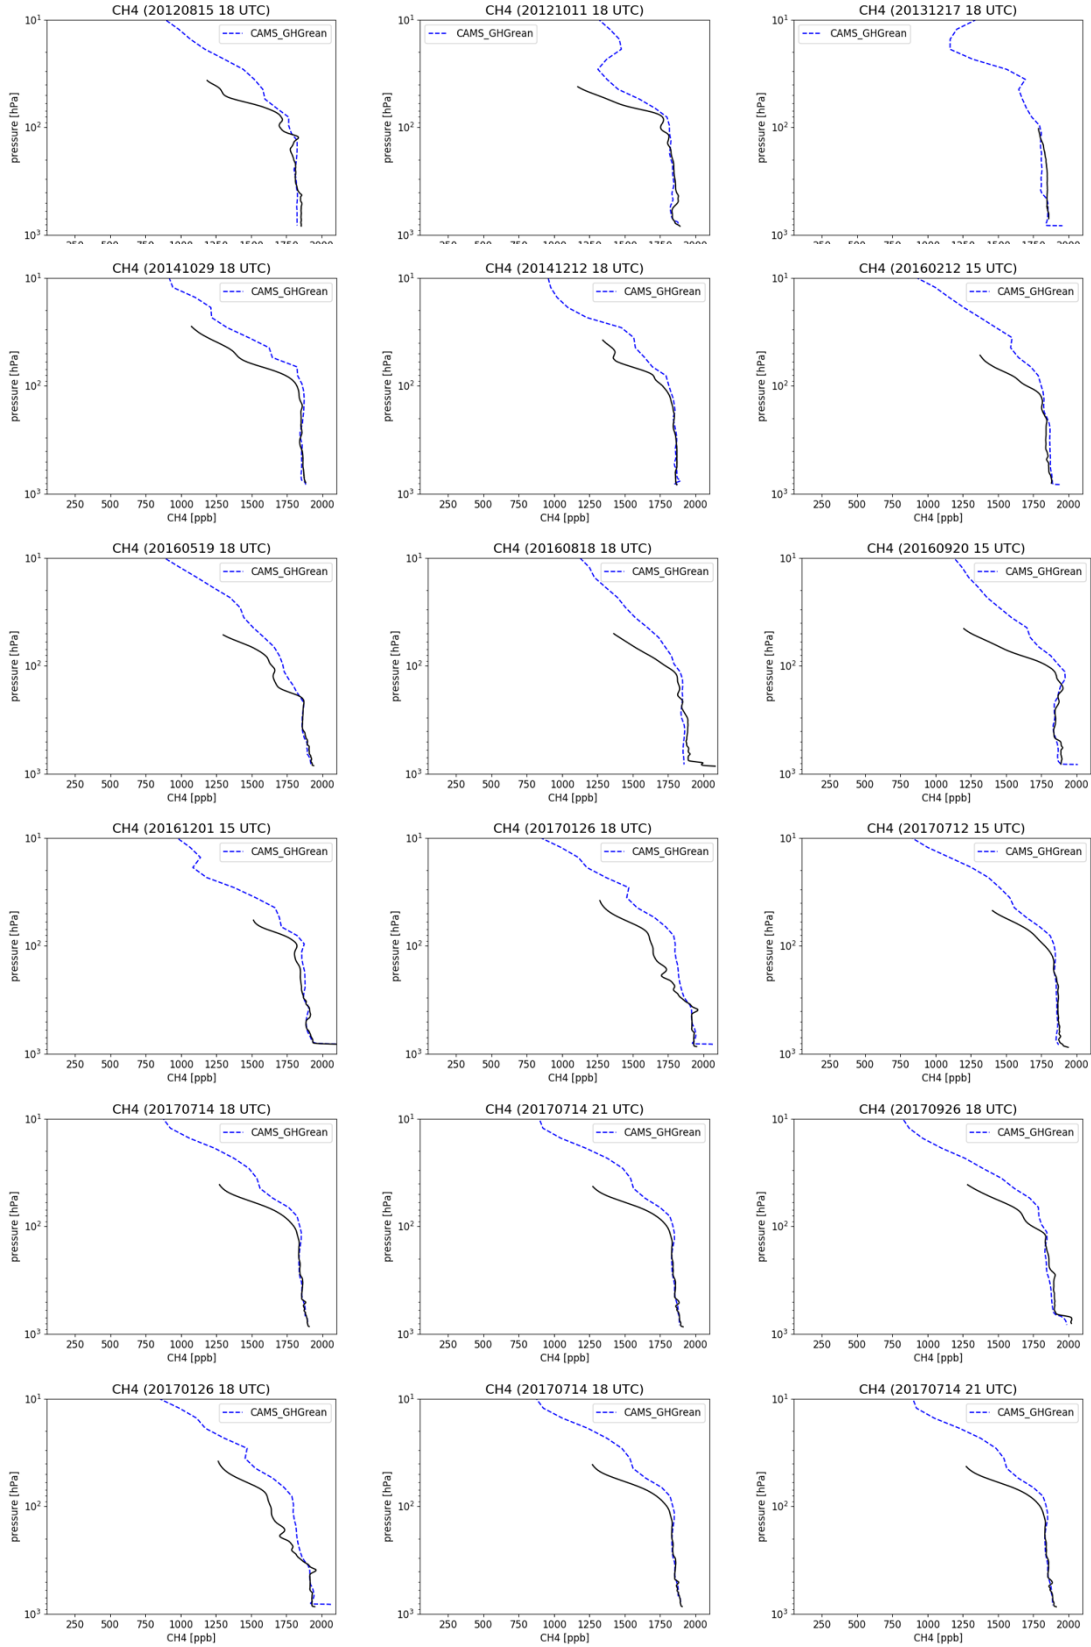

Fig S1b Vertical mole fraction profiles of CH<sub>4</sub> from the CAMS GHG reanalysis (dash line) and AirCore observations (solid line) at Boulder (CO, USA, see Table A3) (*continued in the next page*).

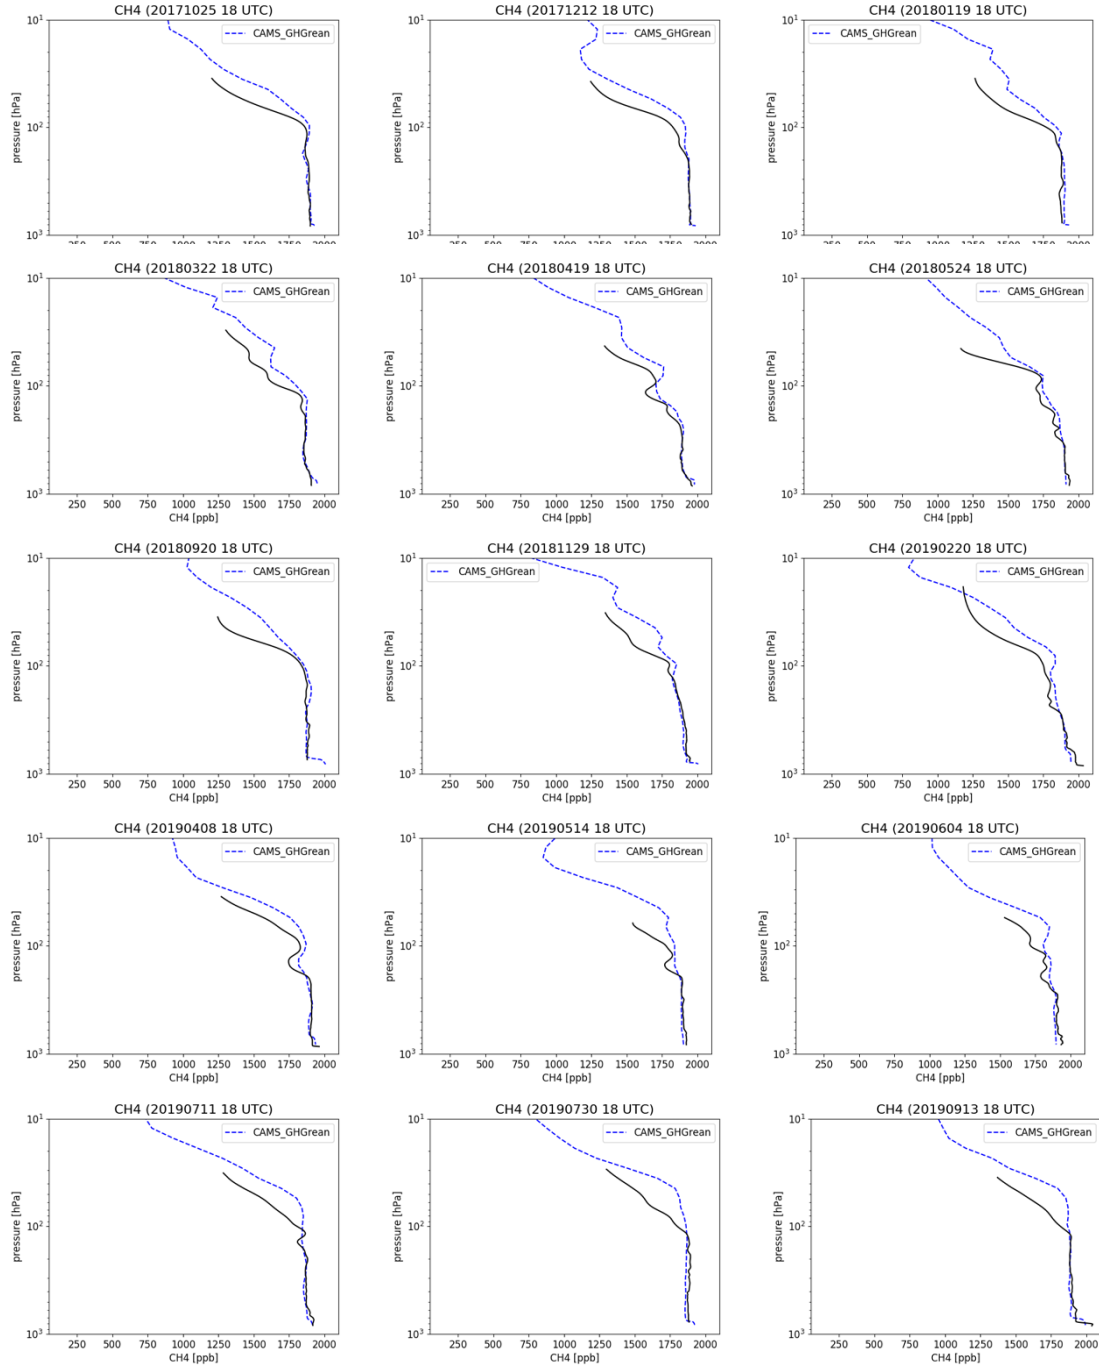

Fig S1b *cont.* Vertical mole fraction profiles of CH<sub>4</sub> from the CAMS GHG reanalysis (dash line) and AirCore observations (solid line) at Boulder (CO, USA, see Table A3) (*continued in the next page*).

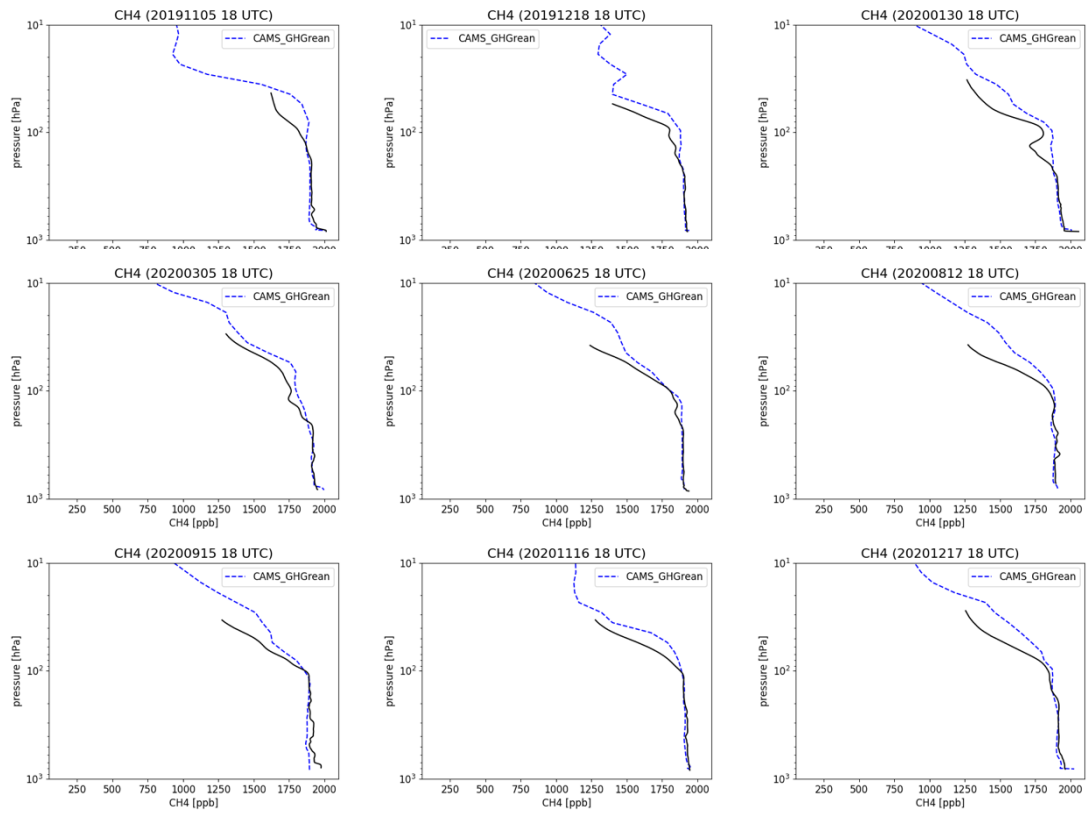

Fig S1b Vertical mole fraction profiles of CH<sub>4</sub> from the CAMS GHG reanalysis (dash line) and AirCore observations (solid line) at Boulder (CO, USA, see Table A3).

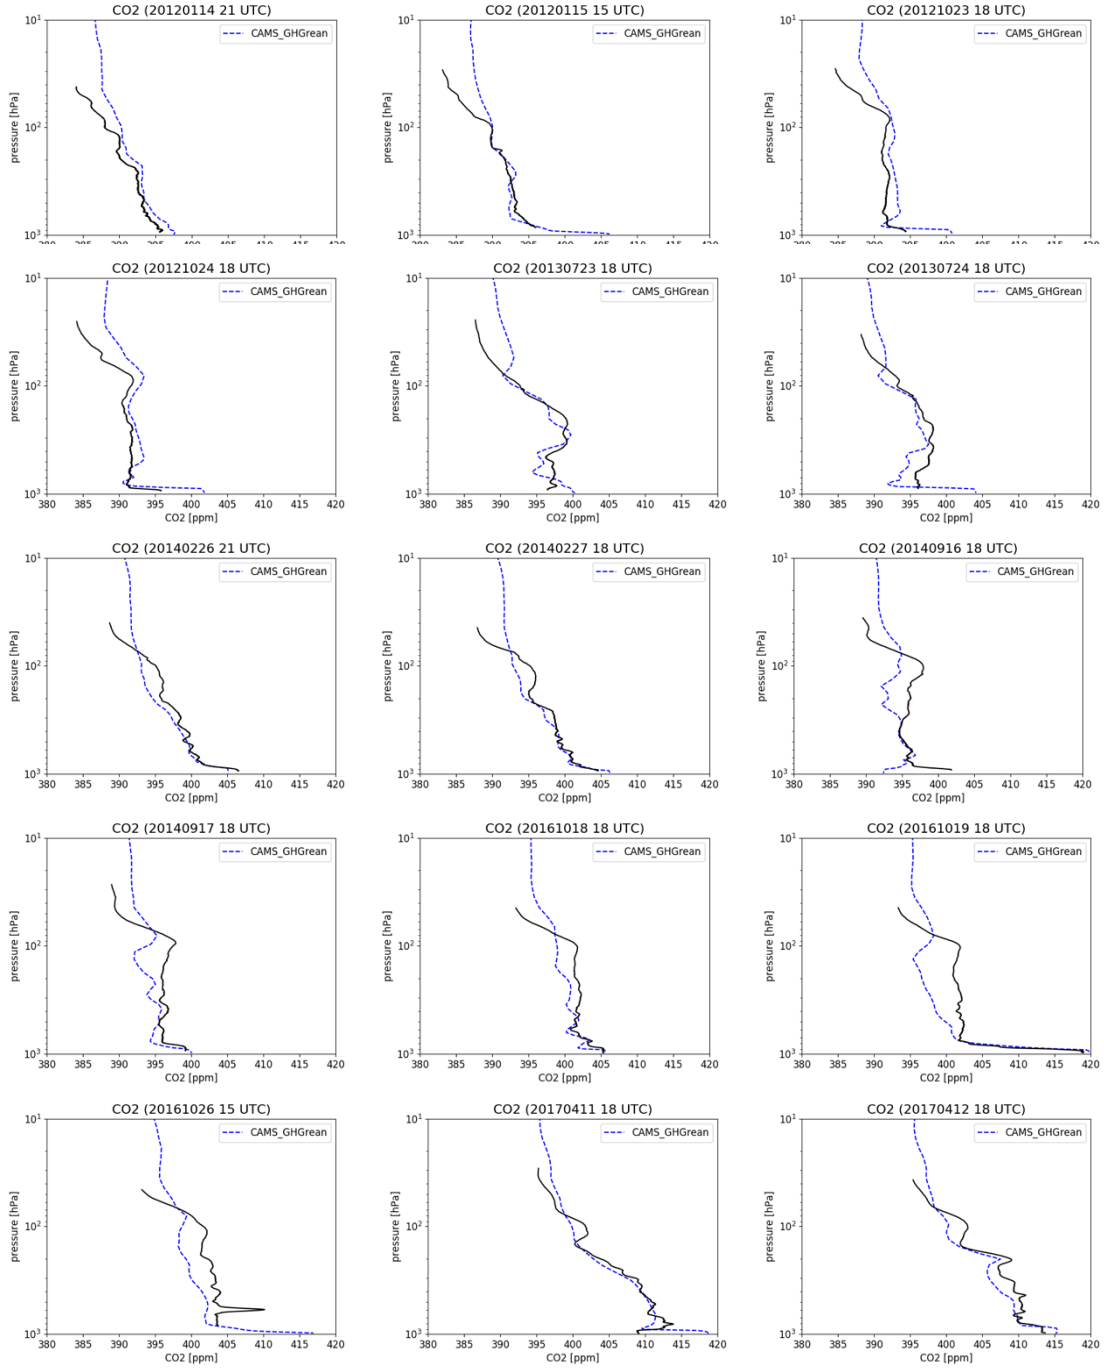

Fig S2a Vertical mole fraction profiles of CO<sub>2</sub> from the CAMS GHG reanalysis (dash line) and AirCore observations (solid line) at Lamont (OK, USA, see Table A3) (*continued in the next page*).



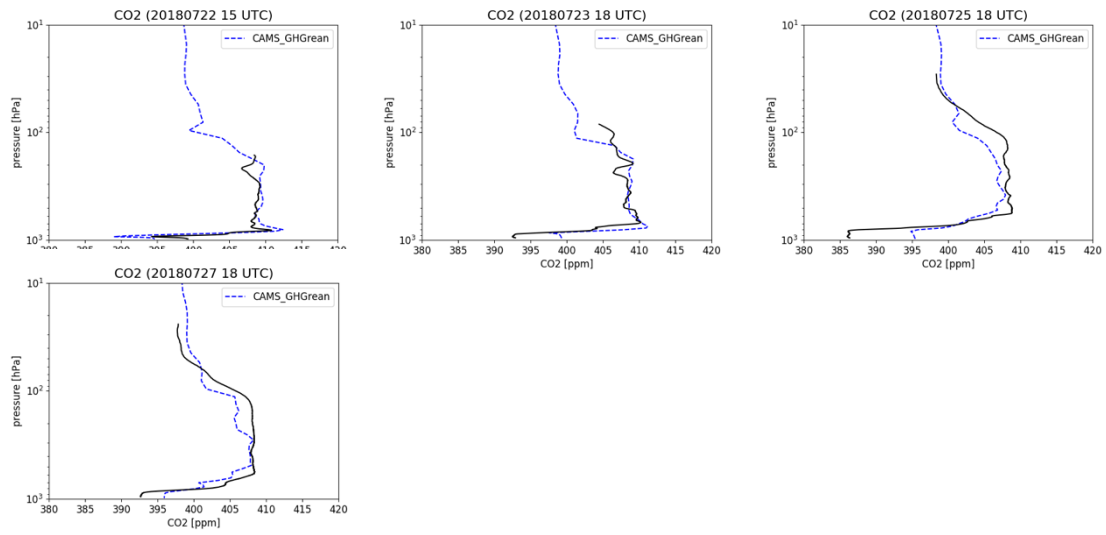

Fig S2a *cont.* Vertical mole fraction profiles of CO<sub>2</sub> from the CAMS GHG reanalysis (dash line) and AirCore observations (solid line) at Lamont (OK, USA, see Table A3).

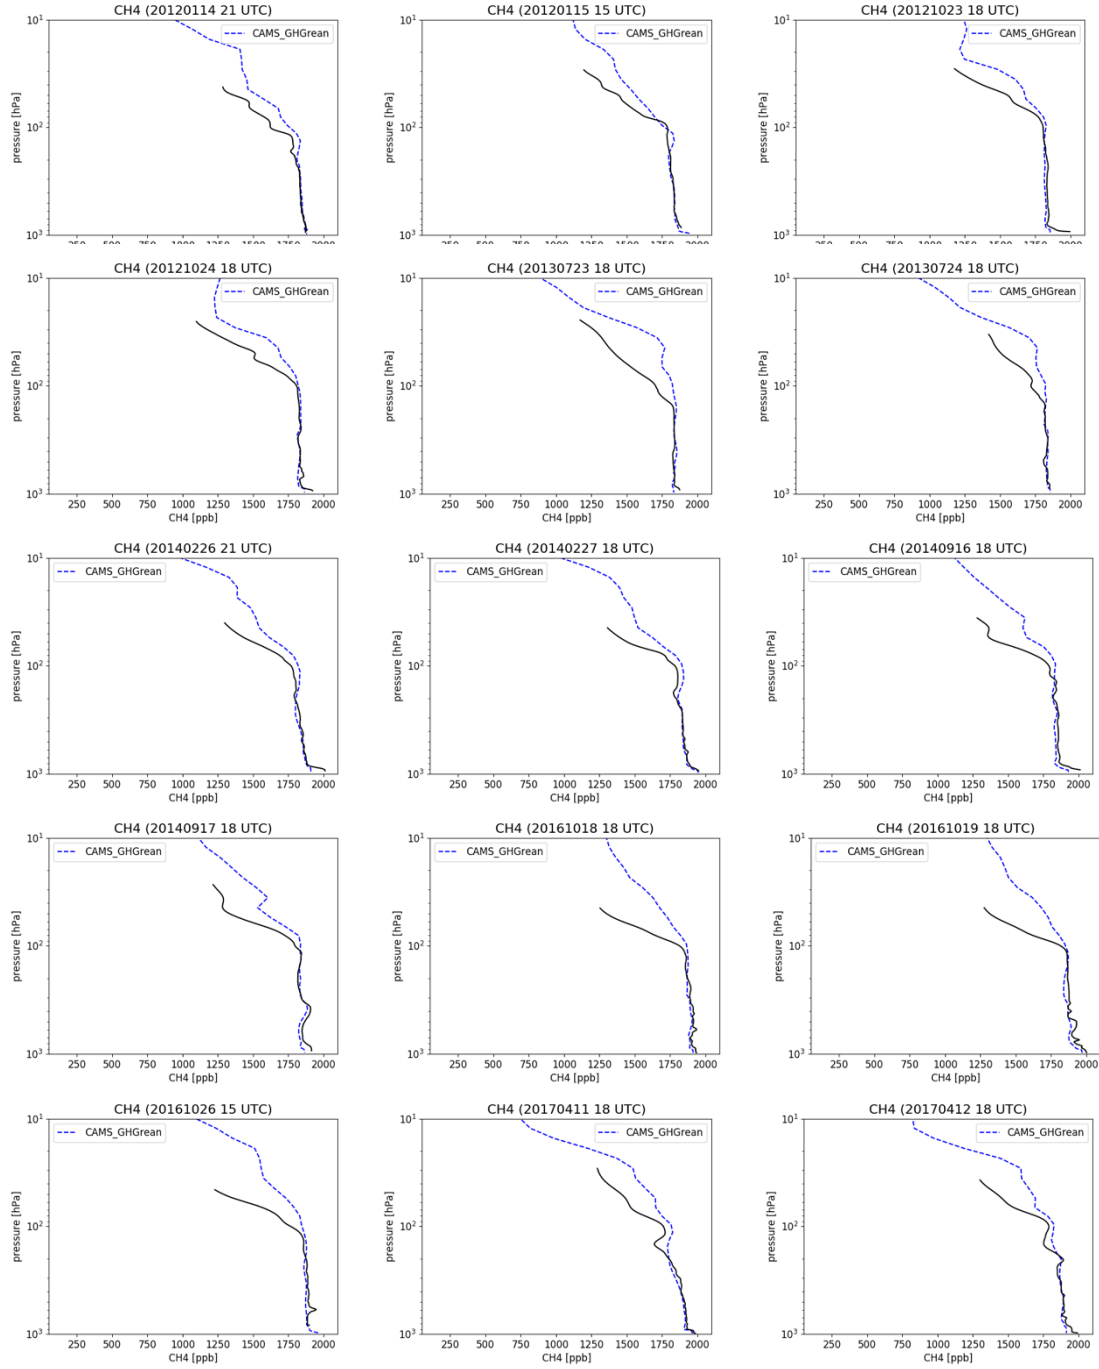

Fig S2b Vertical mole fraction profiles of CO<sub>2</sub> from the CAMS GHG reanalysis (dash line) and AirCore observations (solid line) at Lamont (OK, USA, see Table A3) (*continued in the next page*).

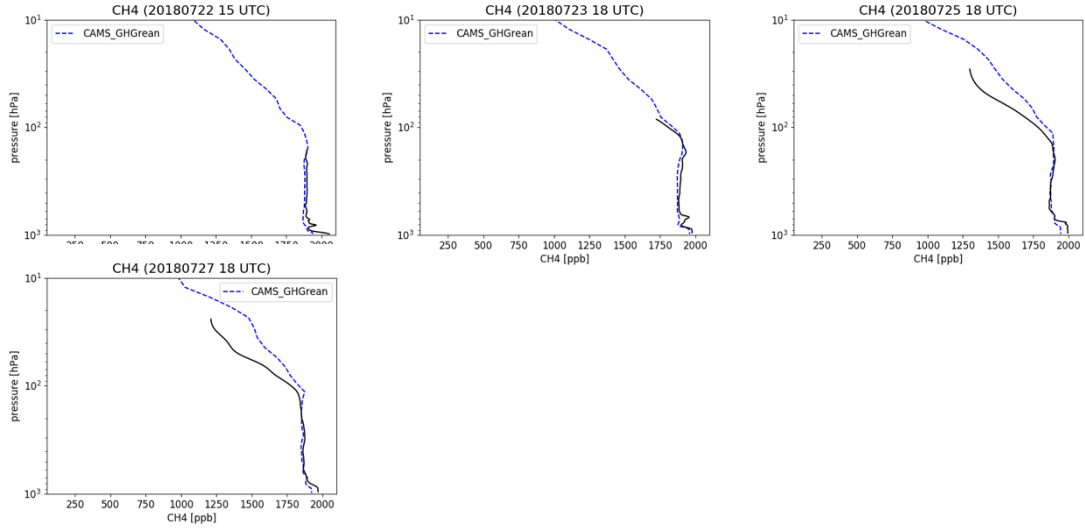

Fig S2b *cont.* Vertical mole fraction profiles of  $\text{CO}_2$  from the CAMS GHG reanalysis (dash line) and AirCore observations (solid line) at Lamont (OK, USA, see Table A3) (*continued in the next page*).

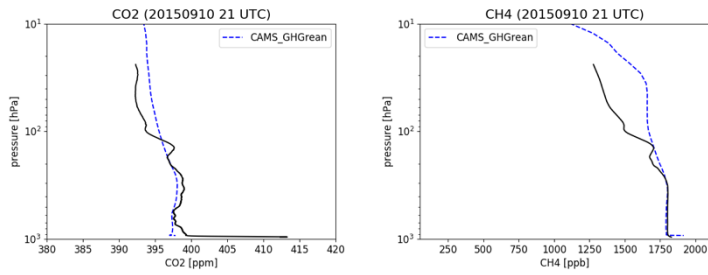

Fig S3 Vertical mole fraction profiles of  $\text{CO}_2$  and  $\text{CH}_4$  from the CAMS GHG reanalysis (dash line) and AirCore observations (solid line) at Lauder (New Zealand, see Table A3).

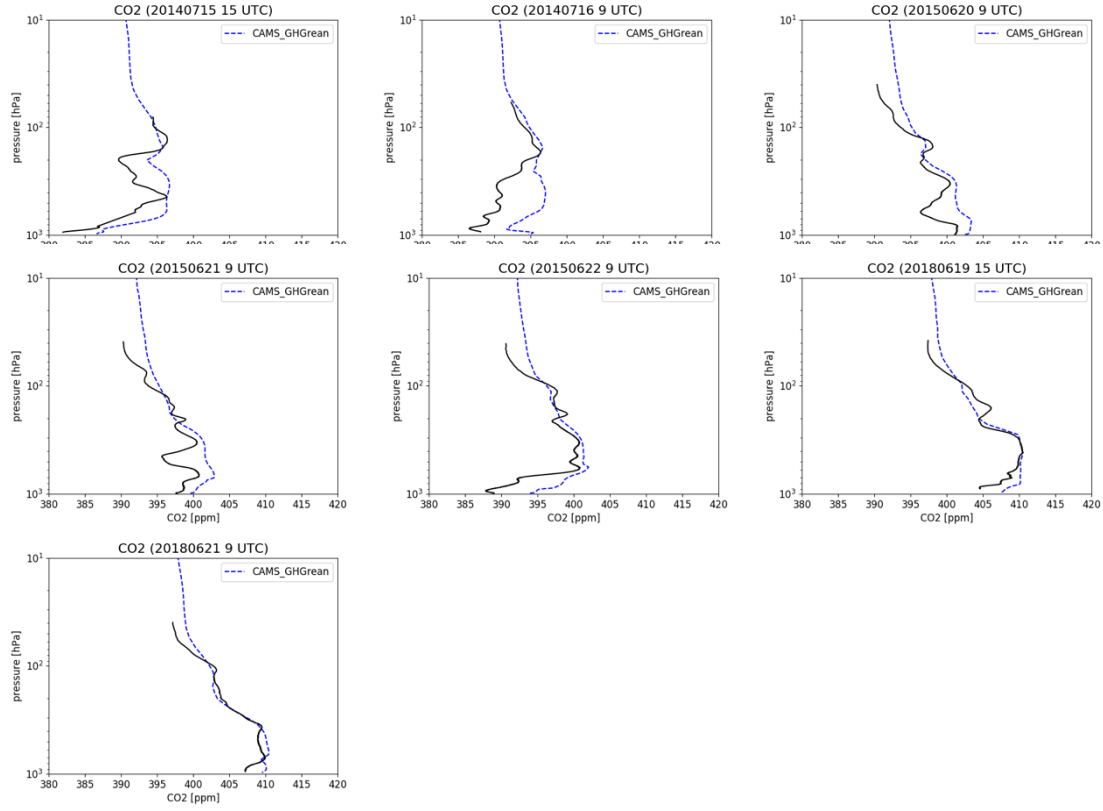

Fig S4a Vertical mole fraction profiles of CO<sub>2</sub> from the CAMS GHG reanalysis (dash line) and AirCore observations (solid line) at Sodankylä (Finland, see Table A3).

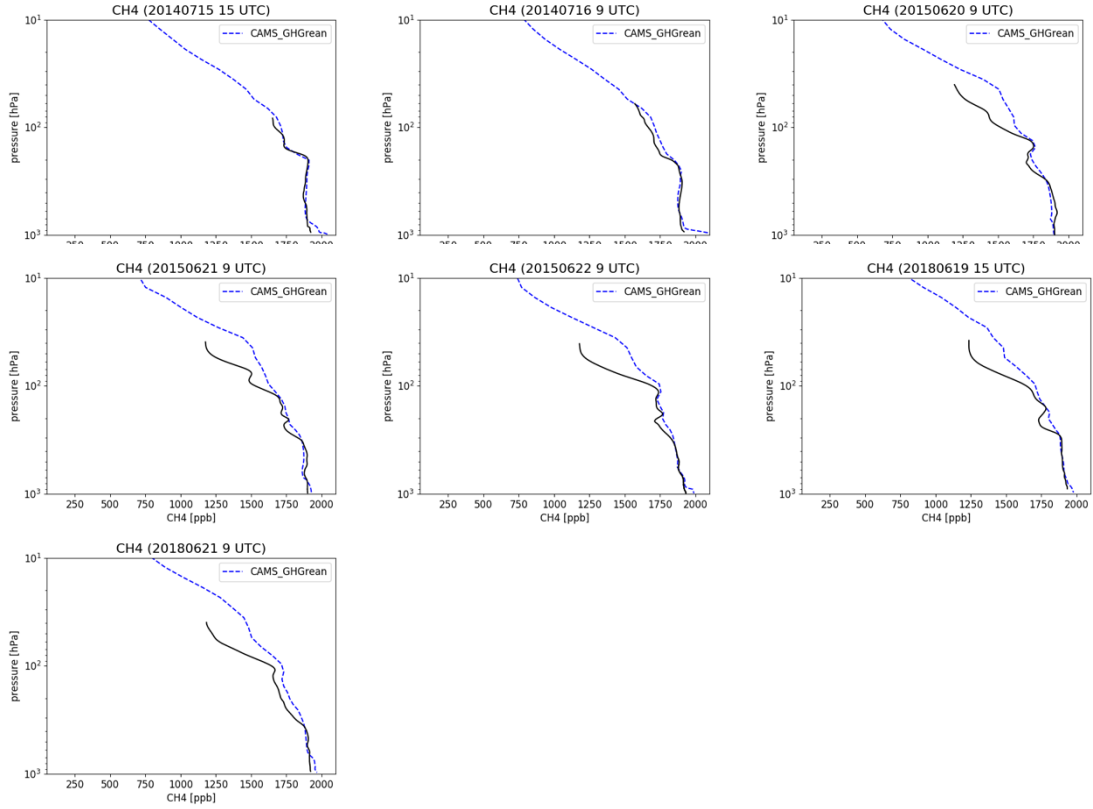

Fig S4b Vertical mole fraction profiles of CH<sub>4</sub> from the CAMS GHG reanalysis (dash line) and AirCore observations (solid line) at Sodankylä (Finland, see Table A3).

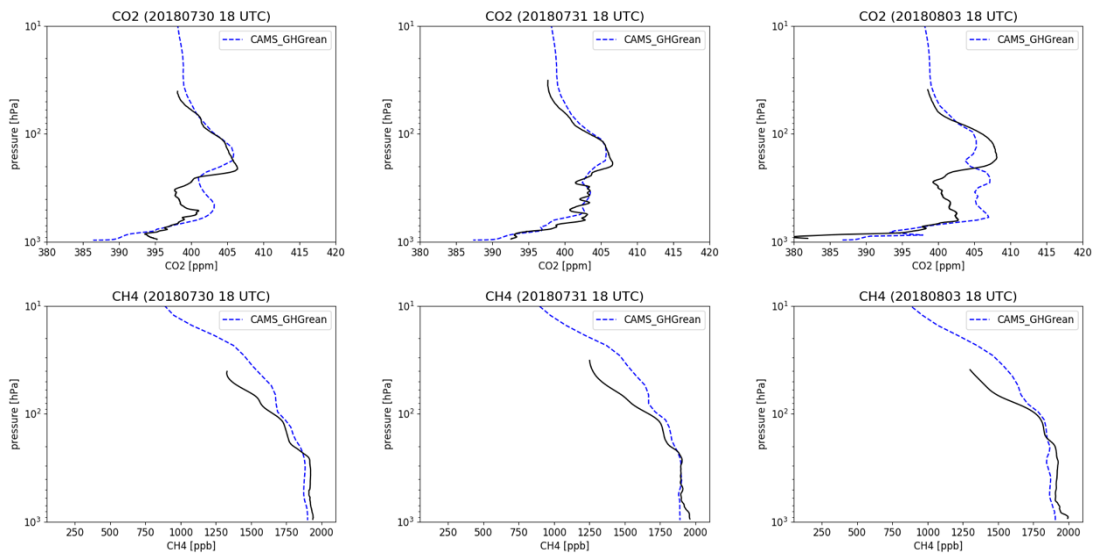

Fig S5 Vertical mole fraction profiles of CO<sub>2</sub> and CH<sub>4</sub> from the CAMS GHG reanalysis (dash line) and AirCore observations (solid line) at Park Falls (WI, USA, see Table A3).

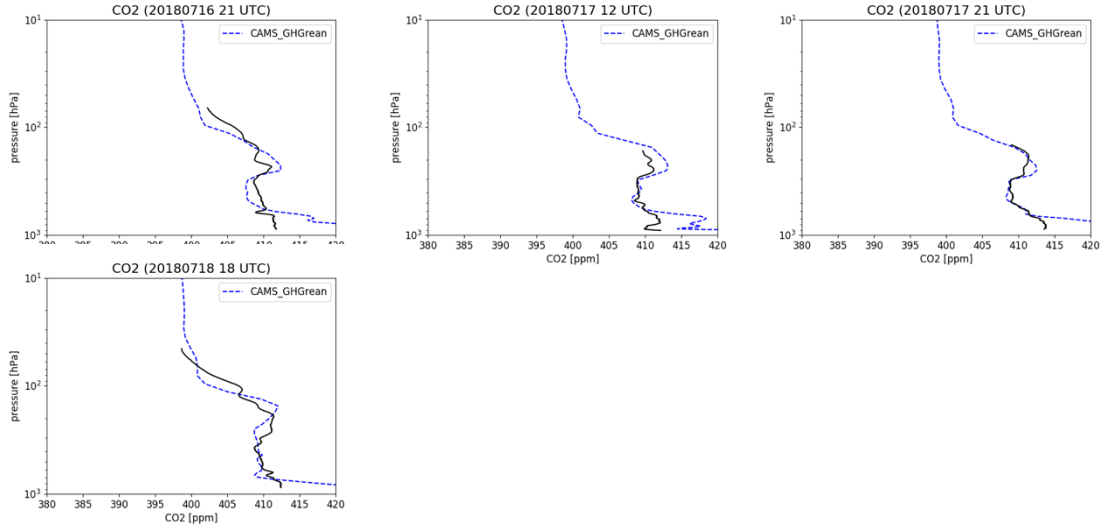

Fig S6a Vertical mole fraction profiles of CO<sub>2</sub> from the CAMS GHG reanalysis (dash line) and AirCore observations (solid line) at Edwards (CA, USA, see Table A3).

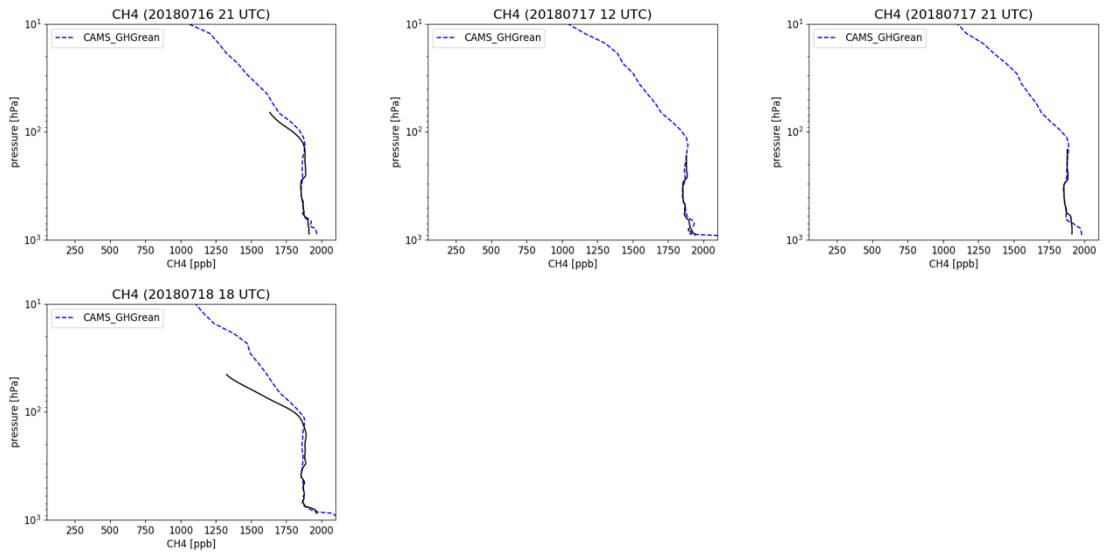

Fig S6b Vertical mole fraction profiles of CH<sub>4</sub> from the CAMS GHG reanalysis (dash line) and AirCore observations (solid line) at Edwards (CA, USA, see Table A3).

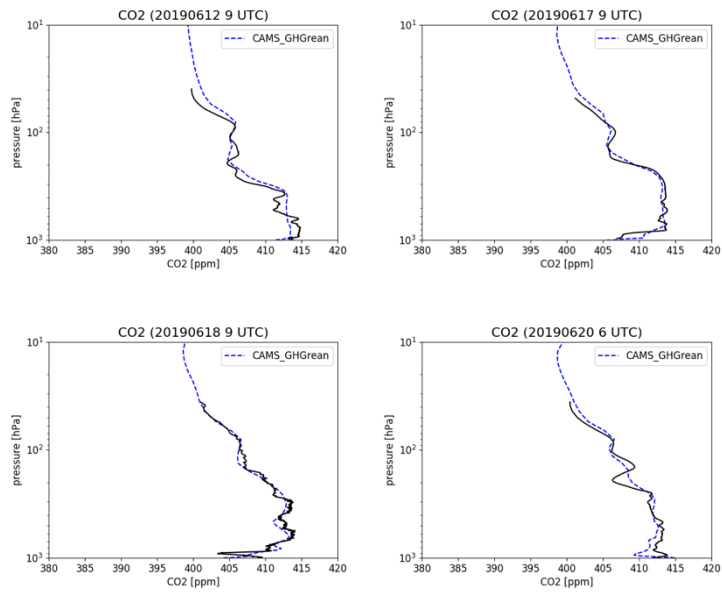

Fig S7a Vertical mole fraction profiles of CO<sub>2</sub> from the CAMS GHG reanalysis (dash line) and AirCore observations (solid line) at Traînou (France, see Table A3).

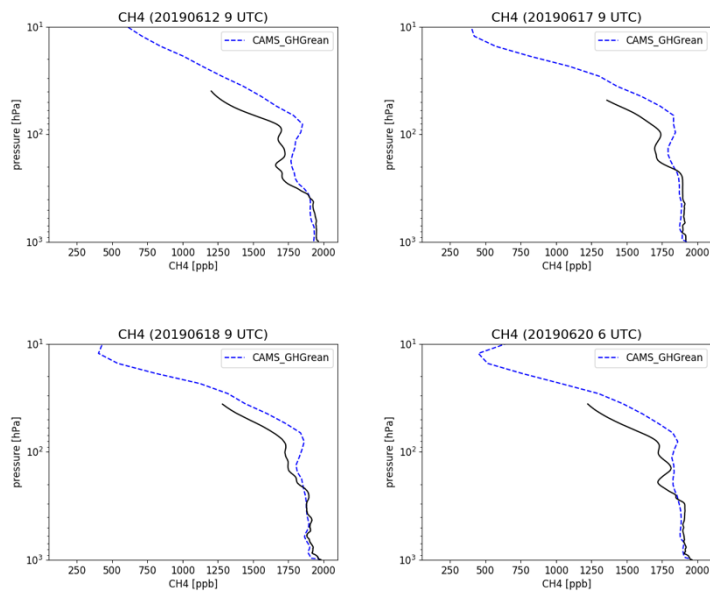

Fig S7b Vertical mole fraction profiles of CO<sub>2</sub> from the CAMS GHG reanalysis (dash line) and AirCore observations (solid line) at Traînou (France, see Table A3).
